# Supplementary material
Source: PubMed Central journal article supplement (PMC1303909)
Supplement: biophysj_86_2_1169__1.pdf [file biophysj_86_2_1169__1.pdf]

## **Sensitivity of Second Harmonic Generation from Styryl Dyes to Trans-Membrane Potential**

Andrew C. Millard,\* Lei Jin,\* Mei-de Wei,\* Joseph P. Wuskell,\* Aaron Lewis<sup>#</sup>

and Leslie M. Loew \*

\* Department of Physiology and Center for Biomedical Imaging Technology,  
University of Connecticut Health Center, Farmington, Connecticut 06030 USA

<sup>#</sup> Department of Applied Physics, Hebrew University, Jerusalem, Israel

Corresponding Author: Leslie M. Loew

Center for Biomedical Imaging Technology,

University of Connecticut Health Center,

263 Farmington Avenue MC-1507

Farmington CT 06030-1507

telephone: 860-679-3568

fax: 860-679-1039

e-mail: les@vlt.uhc.edu

Running Title: SHG Imaging of Membrane Potential

Keywords: non-linear optical imaging, electrophysiology, two-photon excitation fluorescence

## Supplemental Material

**TABLE OF MIRROR AND FILTER COMBINATIONS FOR SHG DETECTION**

| wavelengths    | mirror, M in Figure 2                                   | filters, $F_{SHG}$ in Figure 2                                                   |
|----------------|---------------------------------------------------------|----------------------------------------------------------------------------------|
| 830–870 nm     | CVI Laser TLM1-425-45-UNP-0737<br>reflecting 425–500 nm | Chroma Technology D425/40<br>with CVI Laser SPF-450<br>passing 425–1000 nm       |
| 890 and 910 nm | CVI Laser TLM1-450-45-UNP-0737<br>reflecting 450–500 nm | Chroma Technology D460/50<br>with Oriel Instruments 57530<br>passing 450–1000 nm |
| 930–970 nm     | CVI Laser TLM1-475-45-UNP-0737<br>reflecting 475–500 nm | Chroma Technology D470/40<br>with 475–500 nm band-pass<br>passing 470–1500 nm    |

**TABLE OF DICHOIC AND FILTER COMBINATIONS FOR 2PF DETECTION**

| wavelengths | dichroic, D in Figure 2   | filters, $F_{2PF}$ in Figure 2       |
|-------------|---------------------------|--------------------------------------|
| 830–910 nm  | 560 nm long-pass          | CVI Laser LWP-450<br>with 3 nm BGL39 |
| 910–970 nm  | Chroma Technology 770DCXR | CVI Laser SWP-700<br>with 3 nm BGL39 |

**SYNTHESIS OF CHIRAL DYES DI-4-ANEPMRF AND DI-4-ANEPMPOH**

The chiral reagents for the syntheses were purchased from Sigma Chemical and stored refrigerated prior to use. Fast atom bombardment (FAB) mass spectral analyses were obtained from the Midwest Center for Mass Spectrometry with partial support by the National Science Foundation, Biology Division (Grant No. DIR9017262).

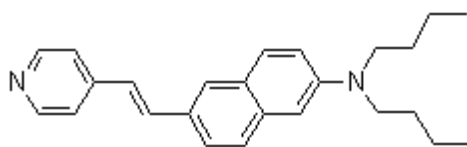

starting compound

The starting compound  $\square$ -(2-(di-*n*-butylamino)-6-naphthyl)-4-vinyl-pyridine was prepared from 6-bromo-2-(di-*n*-butylamino)-naphthalene by the palladium-catalysed Heck coupling procedure described by Hassner et al. (Hassner et al. 1984).

The dye 1-(2-methyl-3-hydroxypropyl)-4-(2-(di-*n*-butylamino)-6-naphthyl)-vinyl-pyridinium bromide or di-4-ANEPMPOH was prepared as follows. A solution of 358 mg (1 mmol) of the starting compound and 306 mg (2.0 mmol) (S)-(+)-3-bromo-2-methylpropanol in 3 ml dry acetonitrile was heated at reflux in a nitrogen atmosphere while stirring for a period of 24 hours. After cooling to ambient temperature, the solvent was removed under reduced pressure on a rotary evaporator and the dark-red semi-crystalline residue stirred in 40 ml ether and refrigerated overnight. The resulting brick-red solid was separated by filtration, rinsed with ether and dried in

air. The crude dye was further purified by chromatography on a silica gel column. Unreacted starting compound was eluted first with chloroform and ethylacetate and the dye eluted as a dark red oil with portions of methanol. This gave 450  $\mu\text{g}$  of the dye, which was further recrystallized from methanol-ether as a dark brown hygroscopic solid. The peak absorption wavelength in ethanol was 502  $\mu\text{m}$ , and the peak emission wavelength in ethanol was 709  $\mu\text{m}$ . Thin layer chromatography (silica gel, one part methanol to four parts chloroform) showed one homogeneous rose-coloured fluorescent spot with  $R_f$  0.193. FAB mass spectral analysis showed  $M^+$  ion at 431.3.

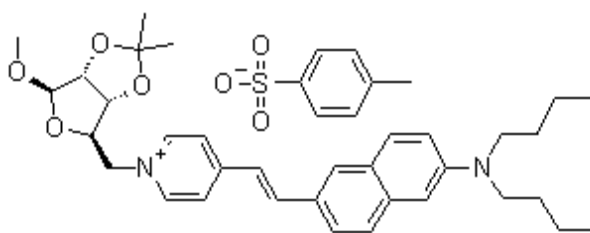

intermediate compound

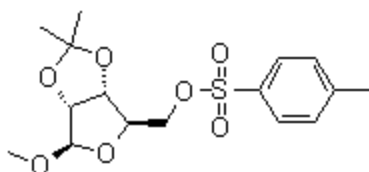

toluene sulfonic acid ester

The intermediate compound 1-(methyl-2,3-*o*-isopropylidene-5- $\beta$ -D-ribofuranosyl)-4-((2-(*di-n*-butylamino)-6-naphthyl)-vinyl)-pyridinium-*p*-toluenesulfonate was prepared as follows. A solution of 330  $\mu\text{g}$  (0.92  $\mu\text{mol}$ ) starting compound and 330  $\mu\text{g}$  (0.92  $\mu\text{mol}$ ) methyl-2,3-*o*-isopropylidene-5-*o*-(*p*-tolylsulfonyl)- $\beta$ -D-ribofuranoside in 3  $\mu\text{l}$  anhydrous *N,N*-dimethylformamide was stirred magnetically and heated by means of an oil bath at 110  $\mu\text{b}$  120°C under a nitrogen atmosphere for a

period of 38 hours. The DMF solvent was removed under reduced pressure at 60°C via water aspirator then vacuum pump at 2 mm Hg, and the dark-red viscous residue taken up in chloroform and charged to a column of silica gel-60. Unreacted naphthyl-vinyl-pyridine starting compound was eluted with chloroform then ethyl acetate, and the intermediate compound was eluted with a 1:1 mixture of methanol and chloroform to give 580 mg of a dark-red viscous oil.

The dye 1-(methyl-5- $\beta$ -D-ribofuranosyl)-4-(2-(di-*n*-butylamino)-6-naphthyl)-vinyl)-pyridinium chloride or di-4-ANEPMRF was prepared as follows. A solution of the intermediate compound and 5 ml de-ionised water containing 3 ml concentrated hydrochloric acid in 15 ml methanol was stirred and heated at reflux for a period of 1.5 hours. After standing at room temperature overnight, the methanol solvent was removed under reduced pressure on a rotary evaporator and the residual aqueous mixture neutralized to pH 8–10 by gradual addition of aqueous sodium carbonate with stirring and cooling in an ice bath. The resultant aqueous dye mixture was extracted into chloroform and the combined extracts washed with saturated brine solution, dried over MgSO<sub>4</sub> and concentrated on a rotary evaporator to leave the crude dye as a red-brown resin. The peak absorption wavelength in ethanol was 502 nm, and the peak emission wavelength in ethanol was 712 nm. Thin layer chromatography (C18RPS, EtOH) showed one homogeneous rose-coloured fluorescent spot just off the origin and the absence of any unhydrolyzed intermediate compound. FAB mass spectral analysis showed M<sup>+</sup> at 505.3.

**ESTIMATE OF 2PF VERSUS SHG PHOTON RATE**

In our use of the Fluoview system, we select imaging conditions such that the membrane pixel values (recorded as 12-bit numbers) are comparable for both SHG and 2PF channels. With a software gain of  $10^4$  on the SHG channel, we set the Pockels cell for the minimum power into the scanner such that we still obtain a reasonable SHG image. In order to obtain a similarly bright 2PF image, we find that a PMT voltage of  $\sim 600\text{V}$  is necessary. Given that the images are comparable, we may use the known characteristics of the detectors to estimate the ratio of the photon rates on the two channels.

Hamamatsu's documentation for the H7421-40 photon-counting head (SHG detector) gives a rate of  $\sim 6 \times 10^5 \text{ counts s}^{-1} / \mu\text{W}$  at  $450\text{nm}$ . The head produces  $5\text{V}$  TTL pulses with a pulse width of  $30\text{ns}$ . We assume that each pulse going into the analogue input electronics of the Fluoview contributes to an average signal collected over the dwell time for each pixel ( $\sim 5\mu\text{s}$ ), such that the analogue equivalent of the head's TTL output is  $5\text{V} \times 30\text{ns} \times 6 \times 10^5 \text{ s}^{-1} / \mu\text{W} = 0.09\text{V} / \mu\text{W}$ . The filters on the SHG channel transmit 60% at  $450\text{nm}$  so, including the  $10^4$  software gain, the effective SHG signal as a function of emitted SHG is  $\sim 5 \times 10^{11} \text{V} / \text{W}$ .

Hamamatsu's documentation for the R3896 photo-multiplier tube (2PF detector) gives a radiant sensitivity of  $\sim 80\text{mA} / \text{W}$  at  $600\text{nm}$  and a gain of  $\sim 2 \times 10^5$  for a PMT voltage of  $600\text{V}$ . The Fluoview amplifier board has an I-to-V gain of  $570\text{V} / \text{A}$ , so the voltage output is  $570\text{V} / \text{A} \times 2 \times 10^5 \times 80\text{mA} / \text{W} = \sim 9 \times 10^9 \text{V} / \text{W}$ . The filters on the 2PF channel transmit  $\sim 50\%$  between  $430\text{nm}$  and  $615\text{nm}$ , which range covers  $\sim 40\%$  of the fluorescence emission spectrum, so the effective 2PF

signal as a function of emitted 2PF is  $\sim 2 \times 10^9 \text{ V} / \text{W}$ . For the same signal on both channels, the ratio of 2PF power to SHG power is therefore  $5 \times 10^{11} / (2 \times 10^9) = 250$ . However, SHG photons at  $450 \text{ nm}$  have  $\sim 1.4$  the energy of 2PF photons at  $640 \text{ nm}$ , so the ratio of 2PF photon rate to SHG photon rate is  $\sim 360$ . For comparison, Moreaux et al. (Moreaux et al. 2000) calculate that the SHG cross-section for a single molecule is four orders of magnitude smaller than the 2PF cross-section, but note that the coherence of SHG can make SHG and 2PF powers more comparable with a sufficient density of dye.

## IMAGE PROCESSING

We performed image processing for the display of images using code written in Perl (<http://www.perl.com/>) and using the Netpbm package (<http://netpbm.sourceforge.net/>), running under Mac OS X (Apple Computer, Inc., Cupertino CA). The frames were first nudged, at most by a few pixels, to correct for any slight drift in the position of the cell during imaging. With the frames aligned, a mask corresponding to the cell membrane was generated. Within each frame, the mask was applied to select the bright membrane pixels, and a nearest-neighbour mean filter was applied, with the filter constrained to use only pixels within the mask. Just as the total intensity values,  $I(t_{ij})$ , were normalised as described in Materials and Methods, so were the intensity values of each pixel normalised across the frames by a running average interpolated from the values of that pixel in the frames corresponding to the  $0 \text{ mV}$  reference voltage. We use Wayne Rasband's ImageJ (<http://rsb.info.nih.gov/ij/>) to display the images using a "Fire" lookup table.

**DISCUSSION OF POTASSIUM-INDUCED DEPOLARISATION EXPERIMENTS**

Peleg et al. (Peleg et al. 1999) used undifferentiated P19 neuronal cells to investigate the enhancement of SHG from di-4-ANEPRMF by gold nanoparticles conjugated to antibodies for membrane proteins. The excitation wavelength was again 1064 nm. They depolarised the cells by changing the extracellular potassium concentration from ~5mM to ~45mM, resulting in a reduction in signal by 59%. Calculating a change in TMP of ~50 mV for the depolarisation, and assuming that this represents almost complete depolarisation, this corresponds to a voltage-sensitivity of ~290% / 100 mV using our definition of sensitivity in terms of the signal change relative to the 0 mV intensity.

Campagnola et al. (Campagnola et al. 1999) used an earlier version of the microscope described in this paper to measure SHG and 2PF from L1210 (mouse leukemia) cells stained with di-8-ANEPRMF and excited at 880 nm. They changed the extracellular potassium concentration from ~5 mM to ~135 mM, giving a ~25 mV depolarisation as determined by TMRE. Since ~135 mM potassium will completely depolarise the cell (and in fact damage it beyond recovery), we may assume that the TMP at ~5 mM was ~-25 mV. Using both imaging and cuvette-based spectroscopy, the SHG:2PF signal ratio was found to be reduced by ~54% which, converting to response expressed as a signal change relative to the 0 mV intensity, corresponds to a voltage-sensitivity of ~470% / 100 mV!

One possibility for non-voltage-dependent effects on SHG involves the quadratic dependence of SHG signal on concentration. Changes in dye concentration resulting from changes to the cells could result in significant changes in SHG. For instance, a decrease in concentration of 36% would



produce the same reduction in SHG signal of 59% reported by Peleg et al. (Peleg et al. 1999). In the case of the 54% reduction in SHG:2PF signal ratio reported by Campagnola et al. (Campagnola et al. 1999), the reduction in dye concentration would have had to be 54% as well: SHG being quadratic in concentration and 2PF being linear, the SHG:2PF signal ratio is linear in concentration. (At a maximum staining level of  $\sim 5 \mu\text{M}$ , self-quenching of 2PF would not have been an issue.) However, such significant changes in dye concentration can be reasonably ruled out in the latter case, because Campagnola et al. report that the 2PF signal increased significantly at the same time that the SHG signal decreased. A redistribution of dye molecules between the membrane leaflets would also result in a reduction in SHG signal — particularly for non-chiral dye molecules — while not affecting 2PF signal. (In our voltage-clamping experiments, the simultaneous measurement of 2PF and SHG provides a control for changes in dye concentration. Depending on the dichroic used, either we find 2PF sensitivities of the opposite sign to the SHG sensitivities or we find no apparent changes in 2PF with voltage.)

More generally, we may consider three sources of voltage-sensitivity. (1) In some dyes, there is an orientational response of the dye to TMP, equivalent to electric field induced second harmonic generation or EFISH (Butcher and Cotter 1990). (2) Some dyes, such as TMRE, redistribute between the intracellular and the extracellular media (Ehrenberg et al. 1988) or between the cell membrane and the extracellular medium as a function of TMP (Loew 1999). Such dye redistributions typically require tens of seconds for equilibration. (3) The ideal mechanism for voltage-sensitivity is directly electrochromic. We have previously demonstrated that the reorientation and redistribution mechanisms do not pertain to the fast responses of styryl dyes in 1PF experiments on HLB apparatus (Loew et al. 1979; Loew and Simpson 1981; Fluhler et al. 1985). The agreement of the HLB measurements and our voltage-clamping measurements of SHG

responses to TMP suggests that the SHG voltage-sensitivities reported here are electrochromic. In contrast, the potassium-induced depolarisation experiments (Campagnola et al. 1999; Peleg et al. 1999) make gross changes to the extracellular medium that affect the dye–membrane system, perhaps driving dye into or out of the cell, and hence affecting SHG beyond straightforward electrochromism. For instance, potassium-induced depolarisation is not generally reversible — the 135  $\mu$ M potassium used by Campagnola et al. damages cells beyond recovery — and the potassium-induced depolarisation experiments do not attempt repolarisation to verify that SHG signals return to their original levels. In contrast, voltage-clamping permits us to repeatedly cycle TMP between the reference voltage and a test voltage. By returning to the test voltage many times during the course of imaging, we verify that the response is both reversible and robust.

## REFERENCES FOR SUPPLEMENTAL MATERIAL

- Butcher, P.N. and D. Cotter. 1990. *The Elements of Nonlinear Optics*. Cambridge University Press, Cambridge.
- Campagnola, P.J., M.-D. Wei, A. Lewis and L.M. Loew. 1999. High Resolution Non-Linear Optical Microscopy of Living Cells by Second Harmonic Generation. *Biophys. J.* 77:3341-3349.
- Ehrenberg, B., V. Montana, M.-D. Wei, J.P. Wuskell and L.M. Loew. 1988. Membrane Potential Can be Determined in Individual Cells from the Nernstian Distribution of Cationic Dyes. *Biophys. J.* 53:785-794.
- Fluhler, E., V.G. Burnham and L.M. Loew. 1985. Spectra, Membrane Binding and Potentiometric Responses of New Charge-Shift Probes. *Biochemistry* 24:5749-5755.

- Hassner, A., D. Birnbaum and L.M. Loew. 1984. Charge-Shift Probes of Membrane Potential: Synthesis. *J. Org. Chem.* 49:2546-2551.
- Loew, L.M. 1999. Potentiometric Membrane Dyes and Imaging Membrane Potential in Single Cells. *In* Fluorescent and Luminescent Probes for Biological Activity. W.T. Manson, editor. Academic Press, New York. 210-221.
- Loew, L.M., S. Scully, L. Simpson and A.S. Waggoner. 1979. Evidence for a Charge-Shift Electrochromic Mechanism in a Probe of Membrane Potential. *Nature* 281:497-499.
- Loew, L.M. and L. Simpson. 1981. Charge Shift Probes of Membrane Potential: a Probable Electrochromic Mechanism for ASP Probes on a Hemispherical Lipid Bilayer. *Biophys. J.* 34:353-365.
- Moreaux, L., O. Sandre and J. Mertz. 2000. Membrane Imaging by Second Harmonic Generation Microscopy. *J. Opt. Soc. Am. B* 17:1685-1694.
- Peleg, G., A. Lewis, M. Linial and L.M. Loew. 1999. Non-Linear Optical Measurement of Membrane Potential Around Single Molecules at Selected Cellular Sites. *Proc. Nat. Acad. Sci. USA* 96:6700-6704.
